# Supplementary material
Source: Springer Nature journal article supplement (https://www.springermedizin.de/resource/supplementary/12936_2011_1941_MOESM1_ESM.pdf/9542160)

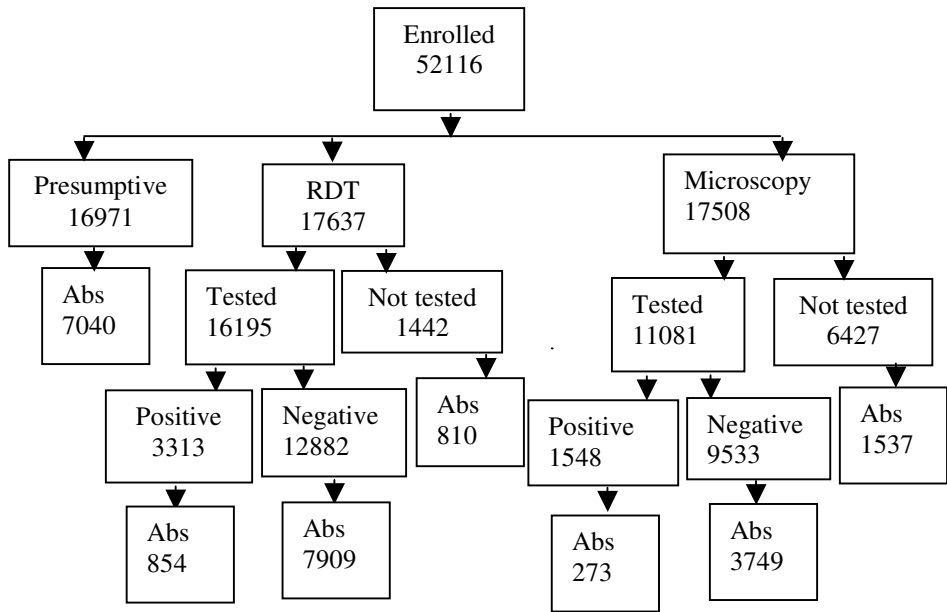

Abs = antibiotics, RDT=rapid diagnostic test

Supplement: MOESM1 [file 9542160]
